# Supplementary material for: Metformin potentiates nephrotoxicity by promoting NETosis in response to renal ferroptosis
Source: PubMed Central journal article supplement (PMC10582023; doi:10.1038/s41421-023-00595-3), 2023-10-17
Supplement: 41421_2023_595_MOESM1_ESM.pdf [file 41421_2023_595_MOESM1_ESM.pdf]

1 **Supplementary Information**

2

3 **Metformin Potentiates Nephrotoxicity by Promoting**  
4 **NETosis in Response to Renal Ferroptosis**

5

6

7 Zhaoxian Cai<sup>#</sup>, Xiaotian Wu<sup>#</sup>, Zijun Song<sup>#</sup>, Shumin Sun, Yunxing Su, Tianyi  
8 Wang, Xihao Cheng, Yingying Yu, Chao Yu, En Chen, Wenteng Chen,  
9 Yongping Yu, Andreas Linkermann, Junxia Min<sup>\*</sup>, Fudi Wang<sup>\*</sup>

10

11

12

13

14 **This file includes:**

15

16       Supplementary Materials

17       Supplementary Figures S1-19

18       Supplementary Tables S1, 2

19

20 **Supplementary Materials**

21

| Reagent or resource                               | Source                     | Identifier                   |
|---------------------------------------------------|----------------------------|------------------------------|
| Chemicals, Recombinant Proteins                   |                            |                              |
| Metformin hydrochloride                           | TargetMol                  | CAT# T0740                   |
| Nicotinamide                                      | TargetMol                  | CAT# T0934                   |
| Resveratrol                                       | TargetMol                  | CAT# T1558                   |
| Rapamycin                                         | TargetMol                  | CAT# T1537                   |
| Dasatinib                                         | TargetMol                  | CAT# T1448                   |
| Quercetin                                         | TargetMol                  | CAT# T2174                   |
| Ferrostatin-1 (Fer-1)                             | Selleck                    | CAT# S7243                   |
| Necrostatin-1 (Nec-1)                             | Selleck                    | CAT# S8037                   |
| Emricasan (IDN-6556)                              | Selleck                    | CAT# S7775                   |
| GSK484 hydrochloride                              | Selleck                    | CAT#S7803                    |
| Cl-amidine                                        | Selleck                    | CAT#S8141                    |
| SCH527123 (Navarixin)                             | Selleck                    | CAT# S8506                   |
| AMD3100 (Plerixafor) HCl                          | Selleck                    | CAT# S8030                   |
| WZ811                                             | Selleck                    | CAT# S2912                   |
| UNBS5162                                          | Selleck                    | CAT# S8869                   |
| Recombinant mouse NGAL (C-6His)                   | Novoprotein                | CAT# CM17; Lot 0332142HF09   |
| FeCl <sub>3</sub>                                 | Sigma-Aldrich              | CAT# 157740; CAS [7705-08-0] |
| Glycerol                                          | Sinopharm Chemical Reagent | CAT# 10010618; CAS [56-81-5] |
| <b>Antibodies</b>                                 |                            |                              |
| <i>In Vivo</i> MAb anti-Ly6G                      | Bio X Cell                 | CAT# BE0075-1                |
| PE anti-mouse Ly6G antibody                       | Biologend                  | CAT# 127607                  |
| Pacific Blue anti-mouse Ly6G/Ly6C (Gr-1) antibody | Biologend                  | CAT# 108429                  |
| Zombie Green Fixable Viability Kit                | Biologend                  | CAT# 423111                  |

|                                   |                |               |
|-----------------------------------|----------------|---------------|
| Rabbit mAb anti-Ly6G              | Cell Signaling | CAT# 87048S   |
| Anti-CXCR4 antibody               | abcam          | CAT# ab181020 |
| Anti-Lipocalin-2/NGAL antibody    | abcam          | CAT# ab125075 |
| Anti-Lipocalin-2/NGAL antibody    | abcam          | CAT# ab216462 |
| Anti-Lipocalin-2/NGAL antibody    | abcam          | CAT# ab70287  |
| Anti-Myeloperoxidase antibody     | abcam          | CAT# ab208670 |
| Anti-Neutrophil Elastase antibody | abcam          | CAT# ab68672  |

### Experimental models: Organisms/strains

|                                              |                          |                     |
|----------------------------------------------|--------------------------|---------------------|
| Mouse: C57BL/6JGpt                           | GemPharmatech            | CAT# N000013        |
| Mouse: C57BL/6-Tmprss6em1(flox)Smoc          | Shanghai Model Organisms | CAT# NM-CKO-2116243 |
| Mouse: C57BL/6-Lcn2tm1 (flox)Smoc            | Shanghai Model Organisms | CAT# NM-CKO-00134   |
| Mouse: C57BL/6-Six2 (Cre)Amc/J               | The Jackson Laboratory   | CAT# 009606         |
| Mouse: C57BL/6-Albem1(IRES-iCre-WPRE-pA)Smoc | Shanghai Model Organisms | CAT# NM-KI-200075   |

### Software and algorithms

|                   |              |                                                                                                                       |
|-------------------|--------------|-----------------------------------------------------------------------------------------------------------------------|
| FlowJo v.10.4.1   | FlowJo       | <a href="https://www.flowjo.com/">https://www.flowjo.com/</a>                                                         |
| GraphPad Prism v8 | GraphPad     | <a href="https://www.graphpad.com/scientific-software/prism/">https://www.graphpad.com/scientific-software/prism/</a> |
| ImageJ            | NA           | <a href="https://imagej.net/Fiji/Downloads">https://imagej.net/Fiji/Downloads</a>                                     |
| Loupe Browser     | 10X Genomics | <a href="https://www.10xgenomics.com/products/loupe-browser">https://www.10xgenomics.com/products/loupe-browser</a>   |

### Other

|                            |                       |                                                                               |
|----------------------------|-----------------------|-------------------------------------------------------------------------------|
| Single cell RNA Sequencing | CapitalBio Technology | <a href="https://www.capitalbiotech.com/">https://www.capitalbiotech.com/</a> |
|----------------------------|-----------------------|-------------------------------------------------------------------------------|

22

23

24 **Supplementary Fig. S1**

25

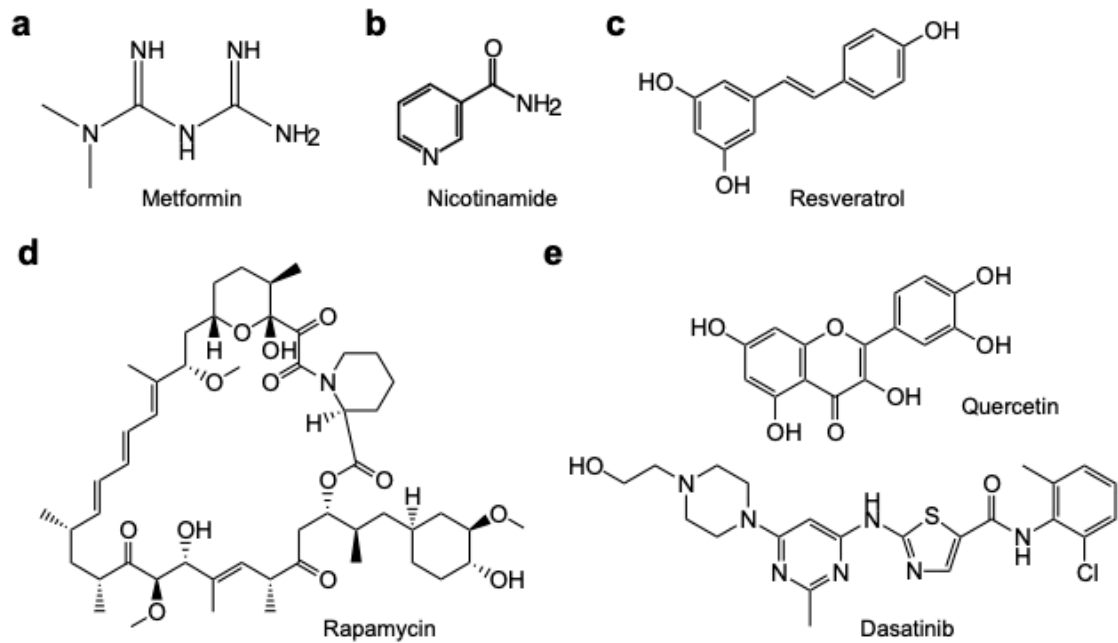

26

27

28 **Supplementary Fig. S1 | Two-dimensional chemical structures of the**  
29 **longevity drugs in Figure 1.**

30

31 **Supplementary Fig. S2**

32

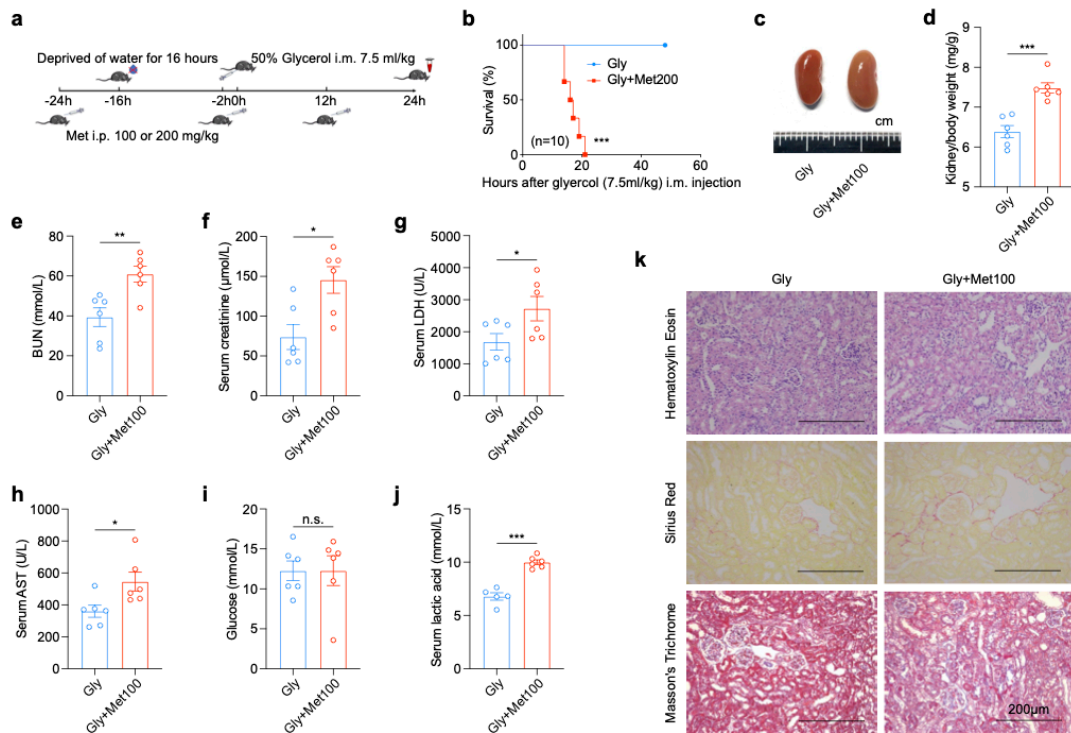

33

34

35 **Supplementary Fig. S2 | Metformin aggregated rhabdomyolysis-induced**

36 **AKI in mice.** **a.** Overview of the experimental procedure used to induce

37 rhabdomyolysis in mice; where indicated, i.p. injections of metformin (100

38 mg/kg or 200 mg/kg) were administered. **b.** Kaplan-Meier survival curves of the

39 indicated groups (n=10 mice per group). **c.** Representative image of kidneys

40 removed from a mouse following Gly (Glycerol 7.5 ml/kg i.m.) and Gly+Met100

41 (100 mg/kg) groups. **d.** Summary of the kidney to body weight ratio measured

42 in the indicated groups. **e-j.** Summary of serum BUN (e), creatinine (f), LDH (g),

43 AST (h), glucose (i) and lactic acid (j) level measured in the indicated mice. **k.**

44 Representative H&E-stained, Sirius Red-stained and Masson's Trichrome-

45 stained kidney sections from indicated mice.

46 Significance in survival curve was calculated using the log-rank (Mantel-Cox)

47 test. \**p*<0.05, \*\**p*<0.01, \*\*\**p*<0.001, and n.s., not significant (Student *t*-test).

48 Data are represented as mean ± SEM.

49

50 **Supplementary Fig. S3**

51

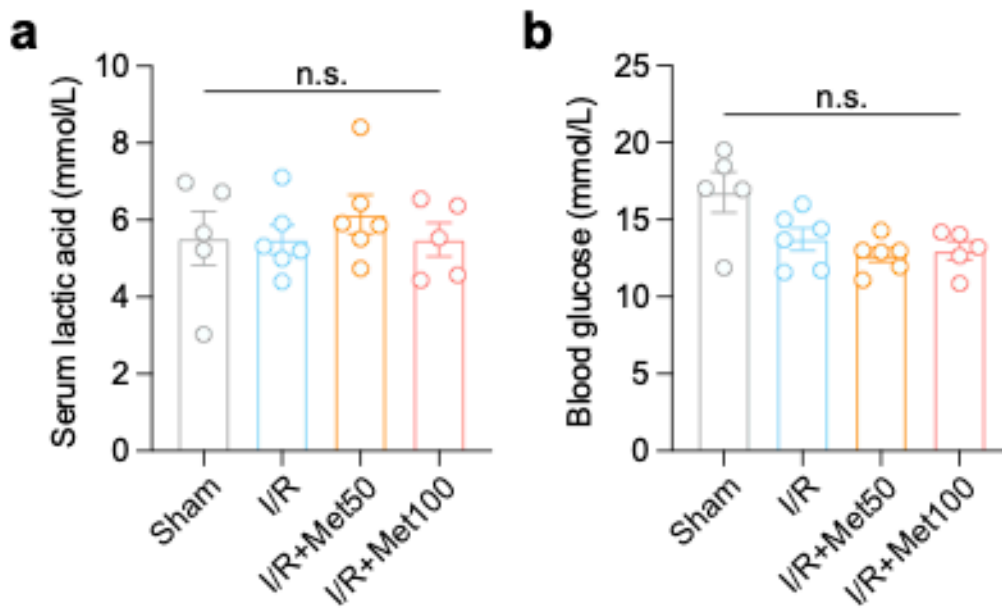

52

53

54 **Supplementary Fig. S3 | The summary of lactic acid and glucose levels in**  
55 **ischemia reperfusion (I/R)-induced acute kidney injury intervened with**  
56 **different dose of metformin. a.** Summary of the serum lactic acid level in  
57 Sham, I/R, I/R+Met50 (50 mg/kg) and I/R+Met100 (100 mg/kg) groups. **b.**  
58 Summary of the glucose level in the indicated mice.

59 n.s., not significant (one-way ANOVA). Data are represented as mean  $\pm$  SEM.

60

61 **Supplementary Fig. S4**

62

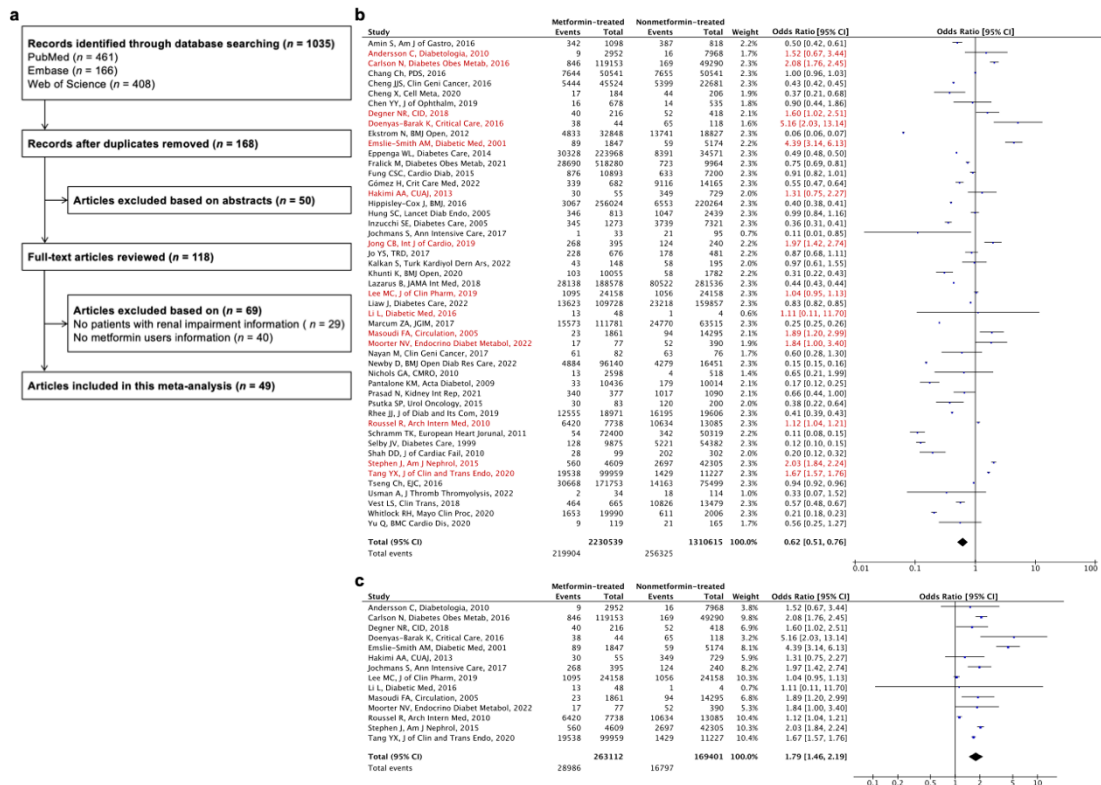

63

64

65

66 **Supplementary Fig. S4 | Meta-analysis of metformin and kidney injury or**  
 67 **diseases. a.** Flow-chart depicting the literature search and selection strategy.

68 After applying the inclusion and exclusion criteria, a total of 49 articles were  
 69 included in the final meta-analysis. **b.** Forest plot showing the effect of kidney  
 70 injury or diseases on the risk of metformin treatment. In this figure, the  
 71 horizontal lines indicate the lower and upper limits of the 95% CI, and the size  
 72 of the blue squares reflects the relative weight of each study in the meta-  
 73 analysis. **c.** Summary of the above cohort studies with OR>1.

74

75 **Supplementary Fig. S5**

76

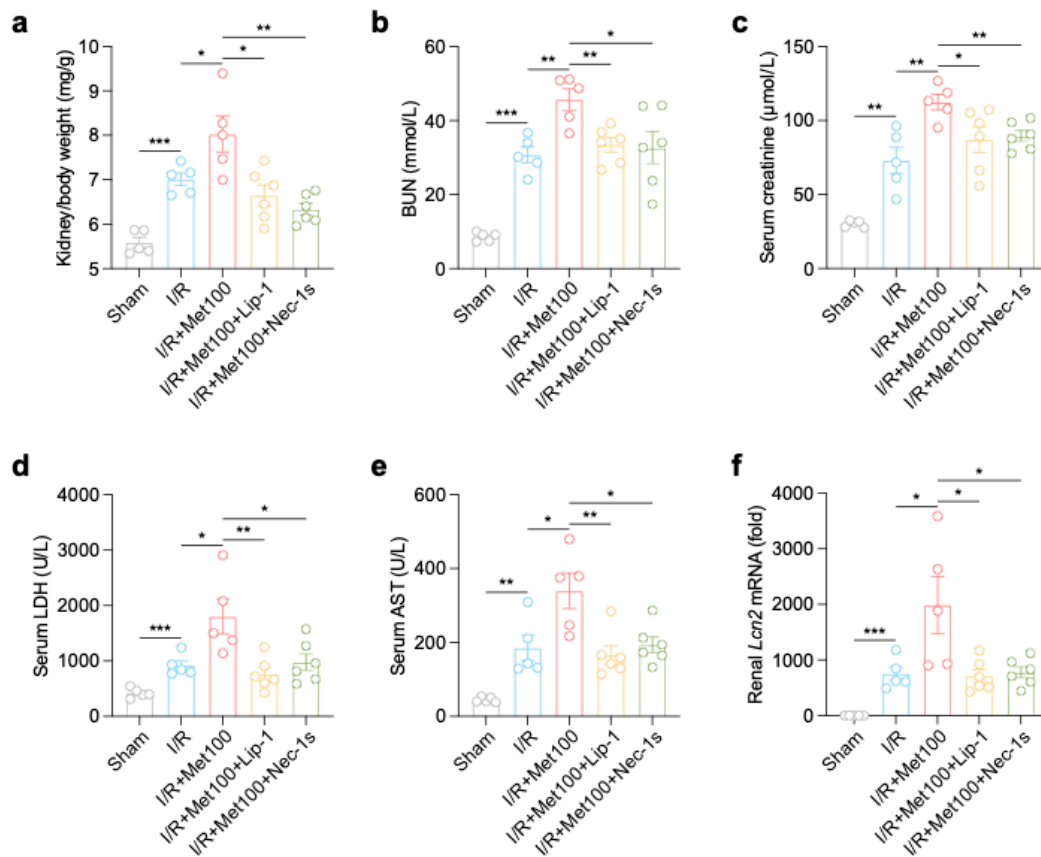

77

78

79 **Supplementary Fig. S5 | Multiple forms of cell death contributed in**  
 80 **metformin-aggravated I/R-induced AKI.** **a.** Summary of the kidney to body  
 81 weight ratio measured in the indicated mice; where indicated, the mice received  
 82 i.p. injections of metformin (100 mg/kg), Lip-1 (1 mg/kg) and/or Nec-1s (1  
 83 mg/kg). **b-e.** Summary of serum BUN (b), creatinine (c), LDH (d), and AST (e)  
 84 were measured in the indicated mice. **f.** Summary of renal *Lcn2* mRNA level  
 85 measured in the indicated mice.

86 \* $p < 0.05$ , \*\* $p < 0.01$ , \*\*\* $p < 0.001$  (one-way ANOVA). Data are represented as  
 87 mean  $\pm$  SEM.

88



89 **Supplementary Fig. S6**

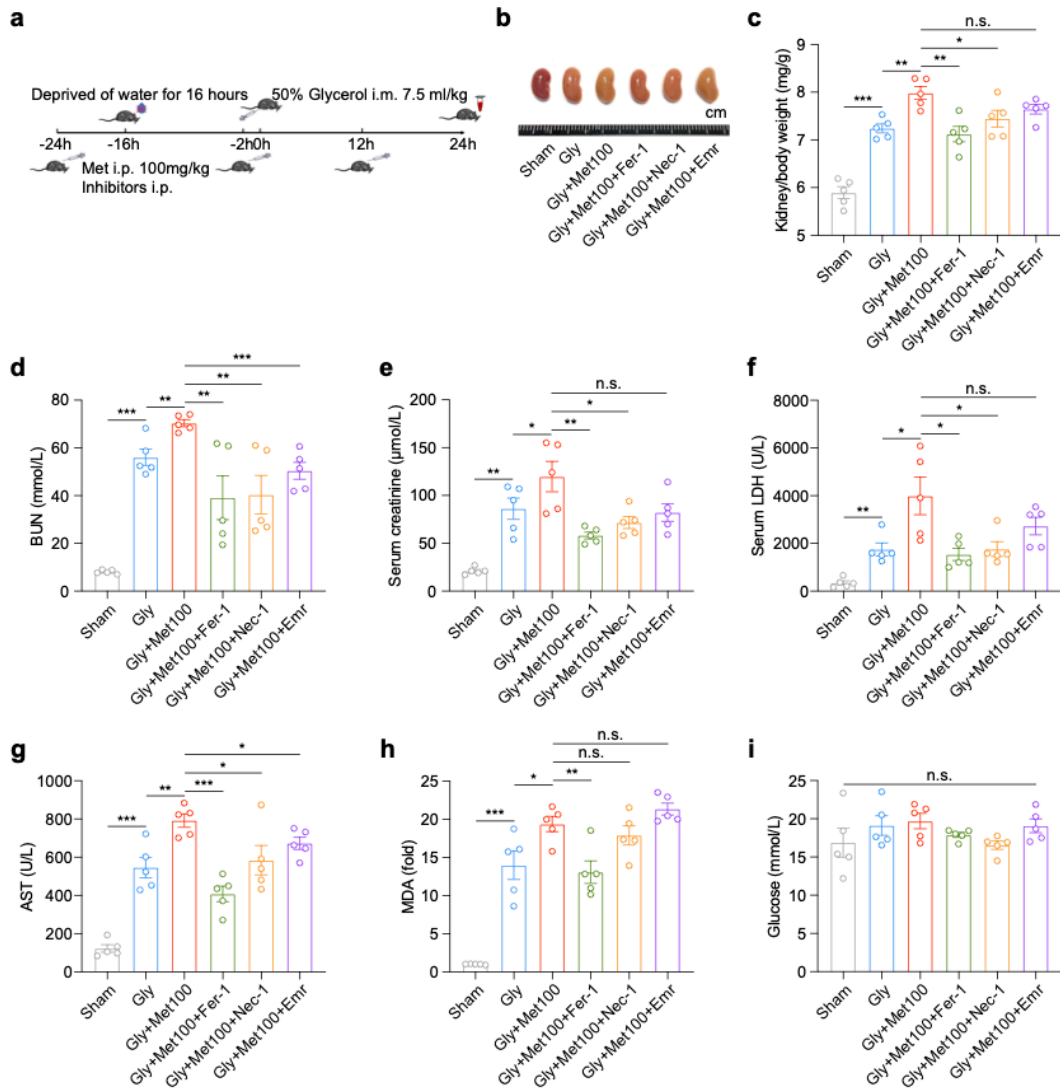

90

91

92 **Supplementary Fig. S6 | Ferroptosis is the main form of metformin-**  
 93 **induced renal cell death in rhabdomyolysis. a.** Overview of the experimen-  
 94 tal procedure used to induce rhabdomyolysis; where indicated, the mice received  
 95 an i.p. injection of metformin (100 mg/kg) and inhibitors. **b.** Representa-  
 96 tive image of kidneys from the indicated mice; where indicated, the mice received  
 97 i.p. injections of metformin (100 mg/kg), Fer-1 (1 mg/kg), Nec-1 (1 mg/kg)  
 98 and/or Emr (2.5 mg/kg). **c.** Summary of the kidney to body weight ratio  
 99 measured in the indicated mice. **d-g.** Summary of serum BUN (d), creatinine  
 100 (e), LDH (f), and AST (g) were measured in the indicated mice. **h.** Summary of  
 101 renal MDA level measured in the indicated mice. **i.** Summary of serum glucose  
 102 levels measured in the indicated mice. \* $p < 0.05$ , \*\* $p < 0.01$ , \*\*\* $p < 0.001$ , and n.s.,  
 103 not significant (one-way ANOVA). Data are represented as mean  $\pm$  SEM.

104 **Supplementary Fig. S7**

105

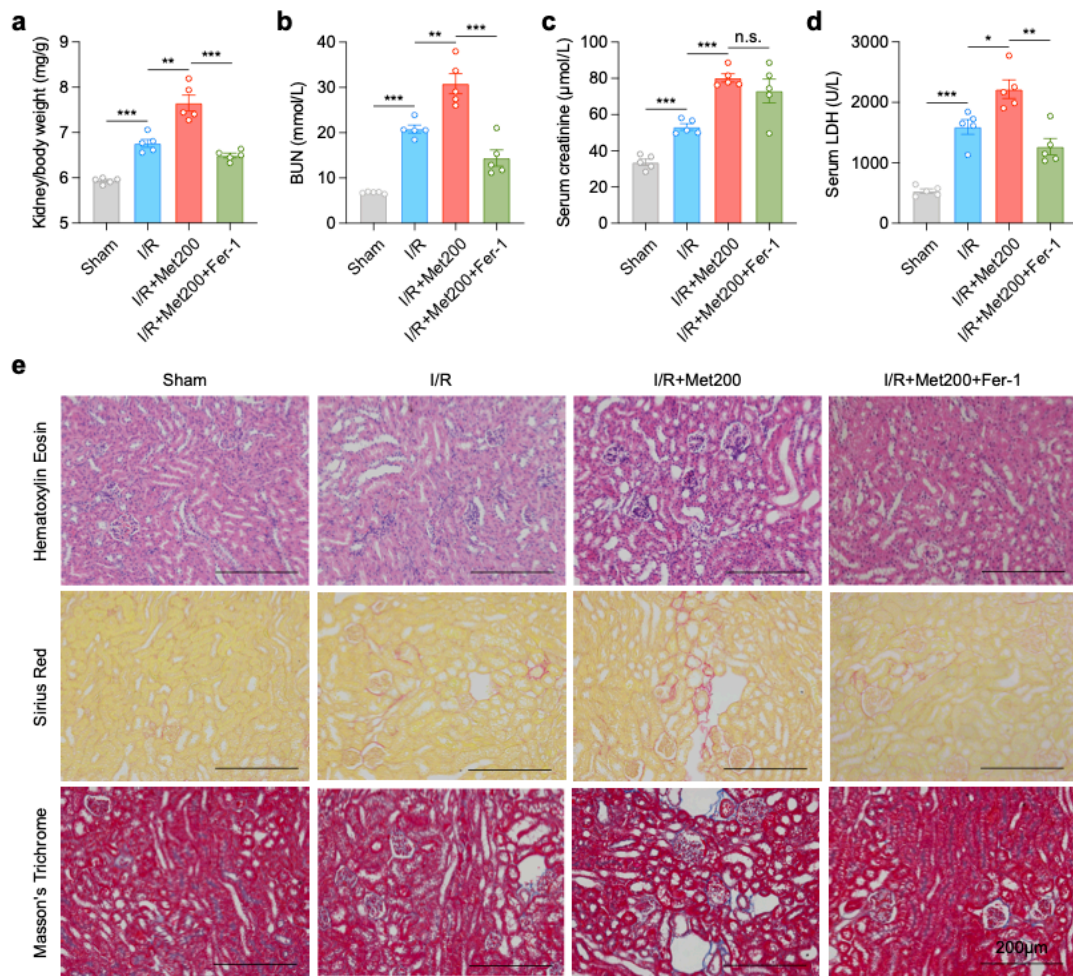

106

107

108 **Supplementary Fig. S7 | The indexes of injury and pathological section of**

109 **scRNA-seq samples. a.** Summary of the kidney to body weight ratio measured

110 in the Sham, I/R, I/R+Met200 and I/R+Met200+Fer-1 groups. **b-d.** Summary of

111 serum BUN (b), creatinine (c), and LDH (d). measured in the indicated mice. **e.**

112 Representative H&E-stained, Sirius Red-stained and Masson-s Trichrome-

113 stained kidney sections from indicated mice. \* $p < 0.05$ , \*\* $p < 0.01$ , \*\*\* $p < 0.001$ ,

114 and n.s., not significant (one-way ANOVA). Data are represented as mean  $\pm$

115 SEM.

116

117 **Supplementary Fig. S8**

118

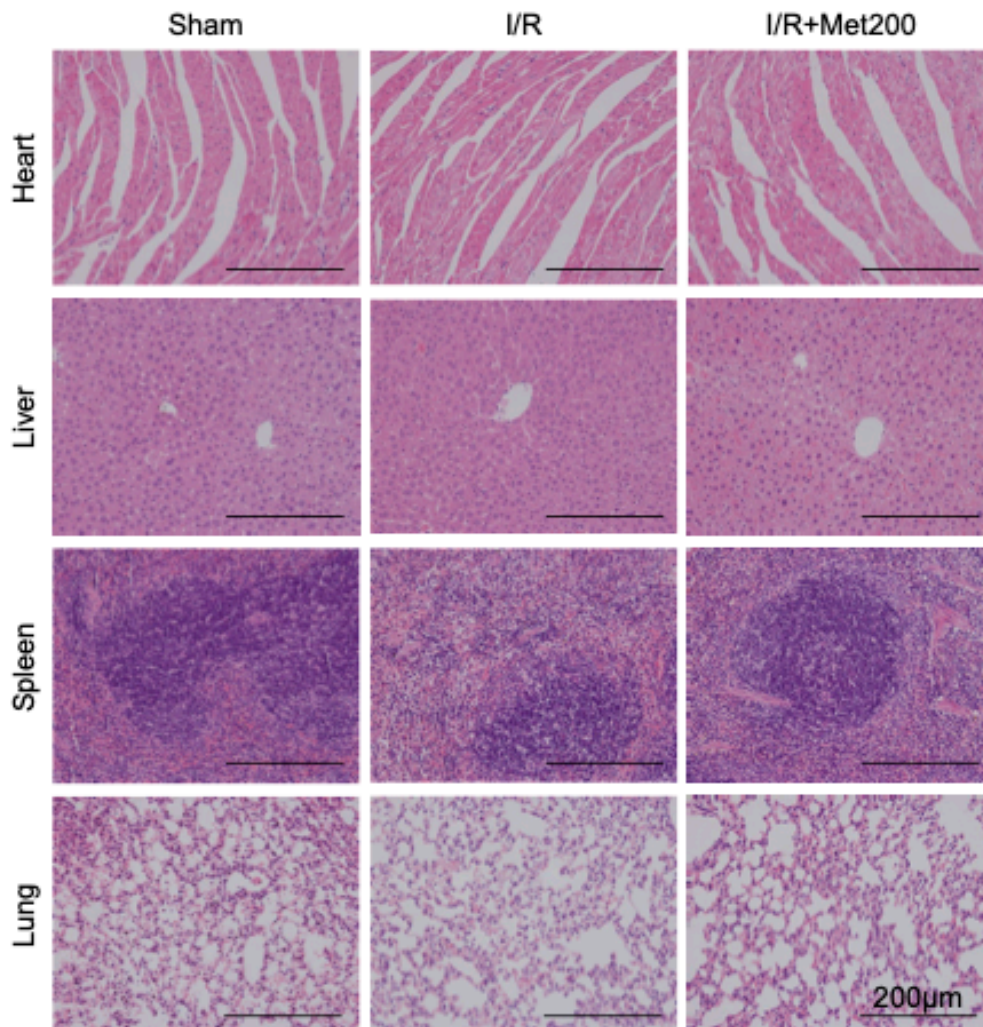

119

120

121 **Supplementary Fig. S8 | The representative images of pathological**  
122 **section of heart, liver, spleen and lung in sham, I/R and I/R+Met200 groups.**

123 Representative image of hearts, livers, spleens and lungs from sham, I/R, and  
124 I/R+Met200 groups.

125

126 **Supplementary Fig. S9**

127

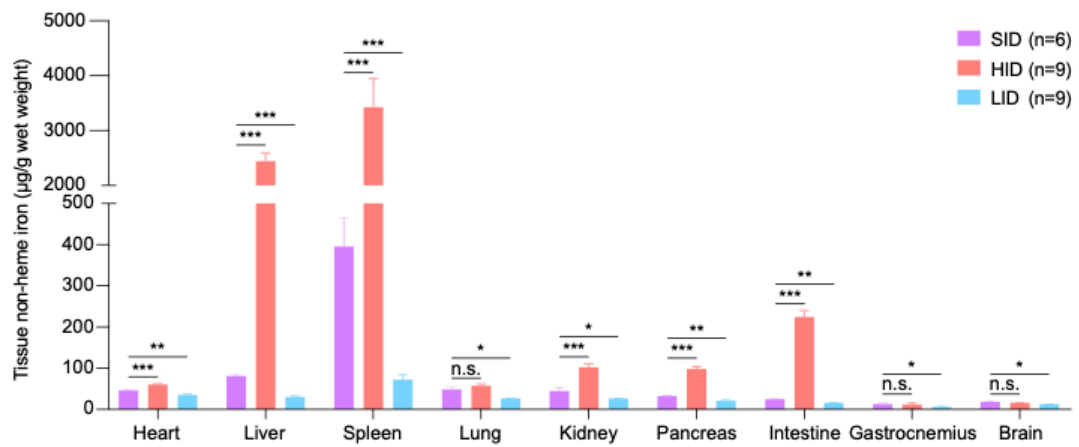

128

129

130 **Supplementary Fig. S9 | Summary of tissue non-heme iron levels.** Non-  
131 heme iron levels were measured in the indicated tissues in mice fed a standard-  
132 iron diet (SID; n=6), high-iron diet (HID; n=9), or low-iron diet (LID; n=9),  
133 followed by I/R+Met. \* $p < 0.05$ , \*\* $p < 0.01$ , \*\*\* $p < 0.001$ , and n.s., not significant  
134 (one-way ANOVA). Data are represented as mean  $\pm$  SEM.

135

136

**Supplementary Fig. S10**

137

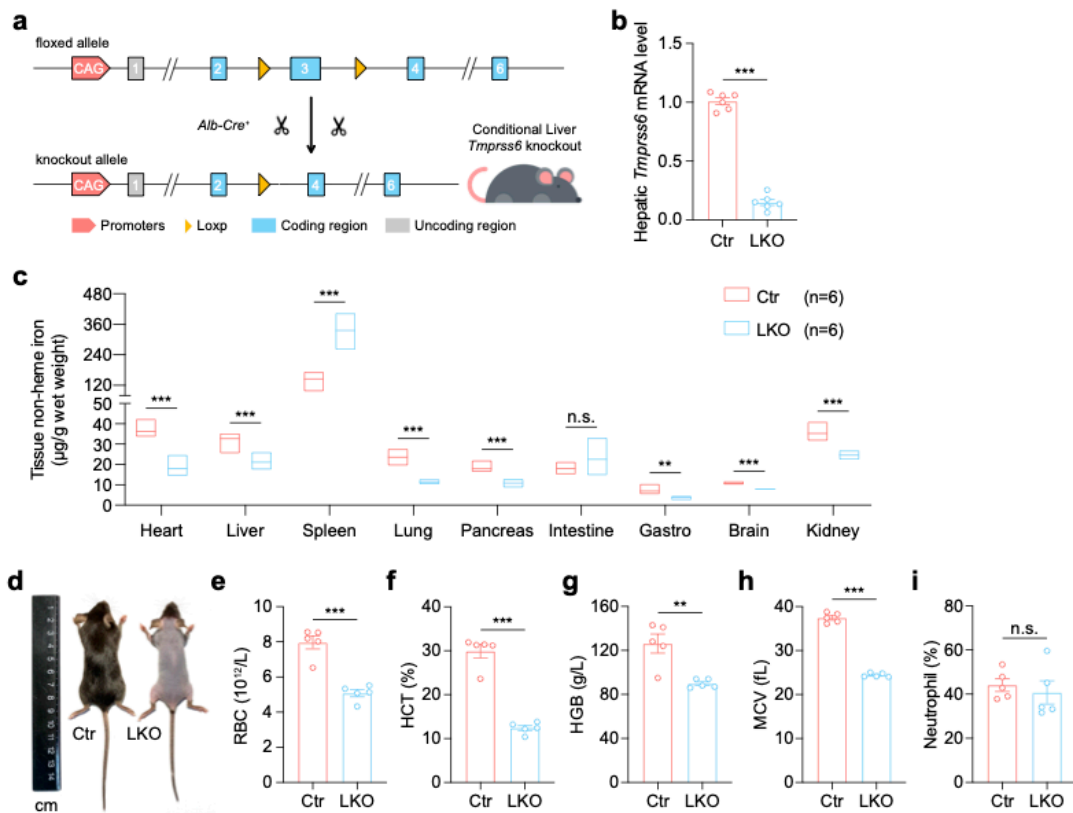

138

139

**Supplementary Fig. S10 | Generation and characterization of liver-specific**

***Tmprss6* knockout mice. a.** Schematic diagram depicting the strategy used

to generate a liver-specific *Tmprss6* knockout mouse. *Tmprss6*<sup>flox/flox</sup> mice were

crossed with *Alb-Cre* transgenic mice to generate *Tmprss6*<sup>Alb/Alb</sup> mice. **b.**

Hepatic *Tmprss6* mRNA was measured in control (Ctr, *Tmprss6*<sup>flox/flox</sup>) mice and

in liver-specific *Tmprss6* knockout (LKO, *Tmprss6*<sup>Alb/Alb</sup>) mice, expressed

relative to control. **c.** Summary of non-heme iron levels measured in the

indicated tissues of the indicated mice (n=6 per group); shown at the right are

the detailed data for non-heme iron levels measured in the kidney. **d.**

Representative images of adult *Tmprss6*<sup>flox/flox</sup> and *Tmprss6*<sup>Alb/Alb</sup> mice. **e-h.**

Summary of the red blood cell count (e), hematocrit value (f), hemoglobin

concentration (g), and mean corpuscular volume (h) measured in the indicated

mice (n=5 per group). **i.** Summary of the percentage of neutrophils in the

circulation of the indicated mice (n=5 per group).

\*\**p* < 0.01, \*\*\**p* < 0.001, and n.s., not significant (Student's *t*-test). Data are

represented as mean ± SEM.

155

156 **Supplementary Fig. S11**

157

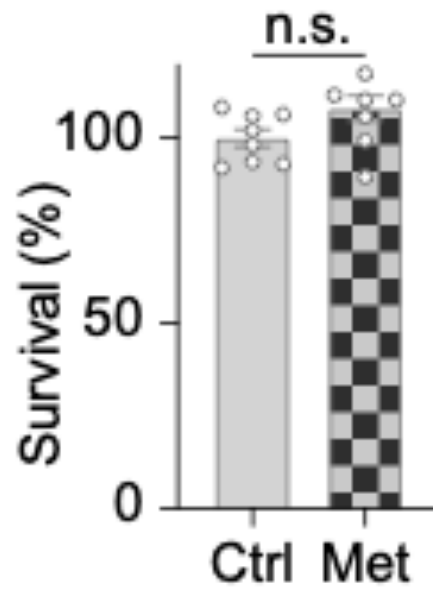

158

159

160

161 **Supplementary Fig. S11 | Metformin has no toxicity on primary mouse**  
162 **renal tubular cells.** Survival of the metformin (200  $\mu$ M) treated primary mouse  
163 renal tubular cells for 24h.

164 n.s., not significant (Student's *t*-test). Data are represented as mean  $\pm$  SEM.

165

166 **Supplementary Fig. S12**

167

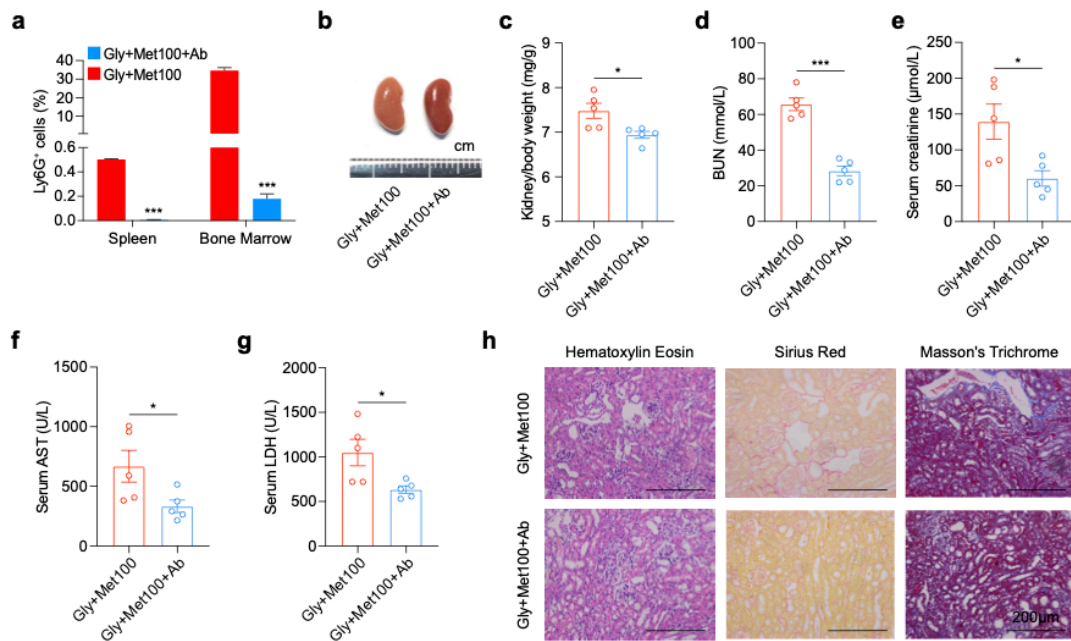

168

169

170 **Supplementary Fig. S12 | Neutrophil clearance protects against**  
 171 **metformin-exacerbated rhabdomyolytic acute kidney injury.** **a.** Flow  
 172 cytometry analysis of the percentage of neutrophils measured in the spleen and  
 173 bone marrow of the indicated mice; where indicated, metformin and the anti-  
 174 Ly6G antibody were administered by i.p. injection at 100 mg/kg and 200 µg per  
 175 mouse, respectively. **b.** Representative image of kidneys in the indicated  
 176 groups. **c.** Summary of the kidney to body weight ratio measured in the  
 177 indicated mice. **d-g.** Summary of serum BUN (d), creatinine (e), AST (f), and  
 178 LDH (g) measured in the indicated mice. **h.** Representative H&E-stained, Sirius  
 179 Red-stained, and Masson's Trichrome-stained kidney sections from the  
 180 indicated mice.

181 \* $p < 0.05$ , \*\*\* $p < 0.001$ , and n.s., not significant (Student's *t*-test). Data are  
 182 represented as mean ± SEM.

183

184 **Supplementary Fig. S13**

185

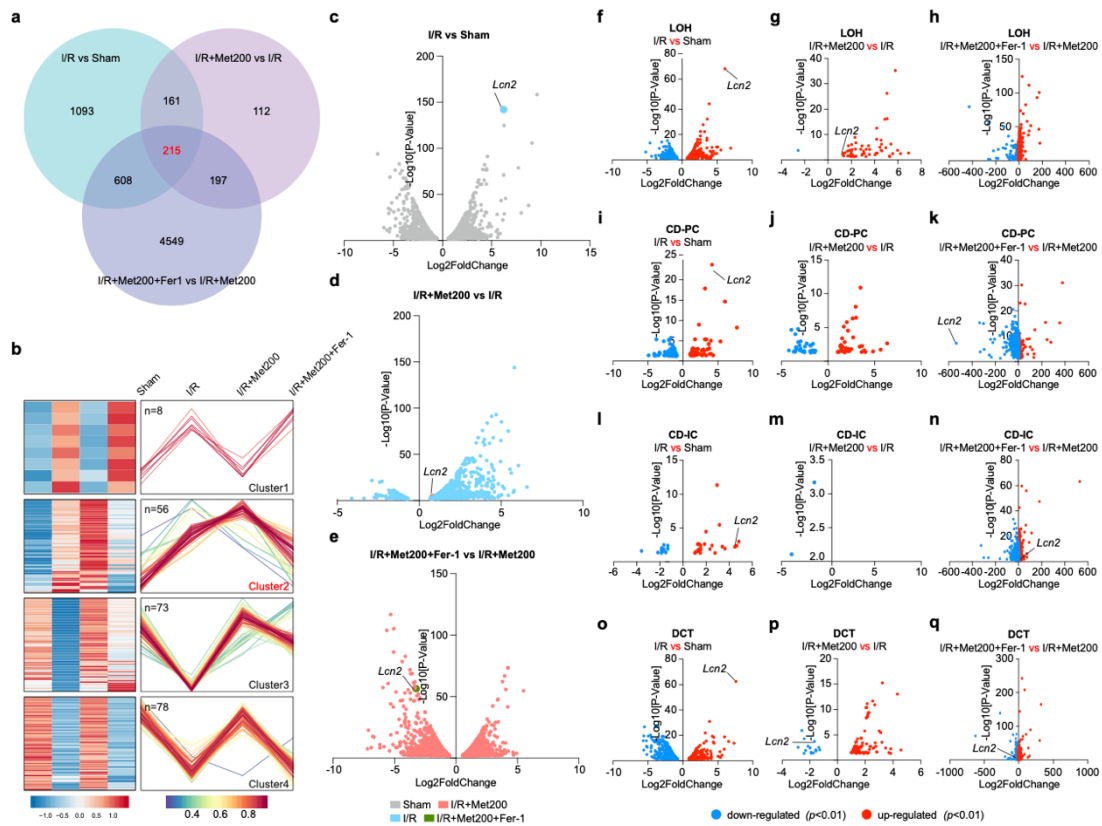

186

187

188 **Supplementary Fig. S13 | Heatmap and volcano plot showing significantly**  
 189 **differentially expressed genes in the indicated conditions. a.** Venn diagram  
 190 of overlapping significantly changed genes ( $p < 0.001$ ) found in each group. **b.**  
 191 The genes changed in common from **Supplementary Figure S10A** are divided  
 192 into 4 clusters according to the change trend via fuzzy clustering. **c-e.** Volcano  
 193 plot showing significantly changed genes ( $p < 0.001$ ) of renal parenchymal cells  
 194 in I/R vs Sham group (c), I/R+Met200 vs I/R group (d), and I/R+Met200+Fer-1  
 195 vs I/R+Met200 group (e). **f-q.** Differentially expressed genes (either up-  
 196 regulated or down-regulated) are shown for cells in the Loop of Henle (LOH; f-  
 197 h), principal cells in the collecting duct (CD-PC; i-k), intercalated cells in the  
 198 collecting duct (CD-IC; l-n), and cells in the distal convoluted tubule (DCT; o-q).  
 199 Where indicated, the *Lcn2* gene is shown.

200



201 **Supplementary Fig. S14**

202

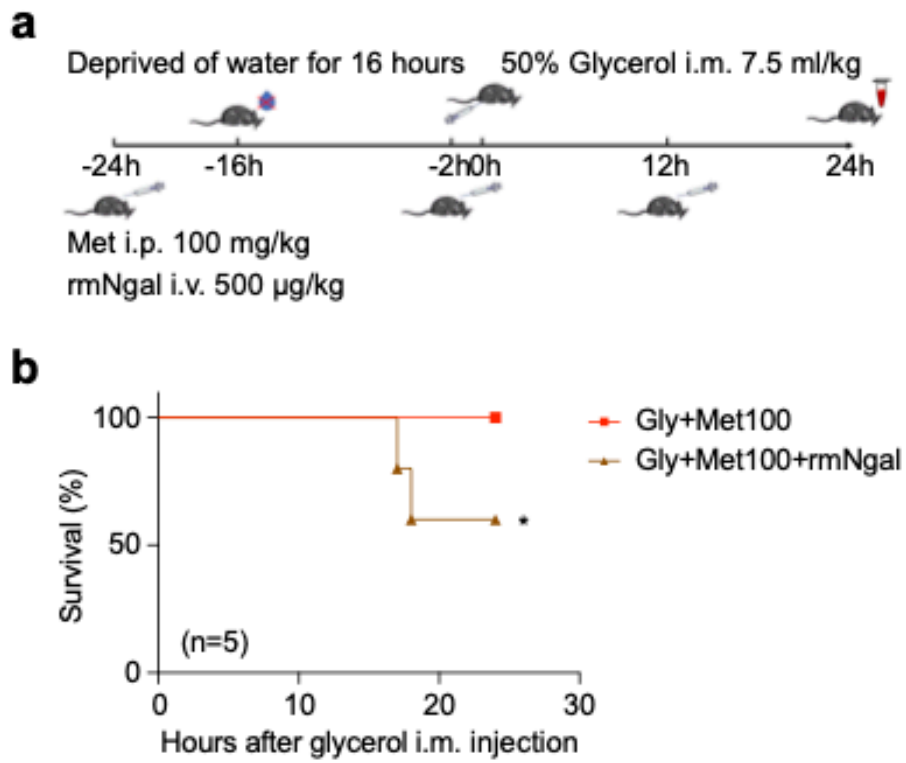

203

204

205

206 **Supplementary Fig. S14 | Injection of recombinant mouse Ngal (rmNgal)**

207 **causes increased mortality in rhabdomyolysis-induced mice. a.** Overview

208 of the experimental procedure for inducing rhabdomyolysis; where indicated,

209 metformin (100 mg/kg, i.p.) and rmNgal (500 µg/kg, i.v.) were administered. **b.**

210 Kaplan-Meier survival curves of mice in the indicated groups (n=5 per group).

211 Significance in survival curve was calculated using the log-rank (Mantel-Cox)

212 test.

213

214 **Supplementary Fig. S15**

215

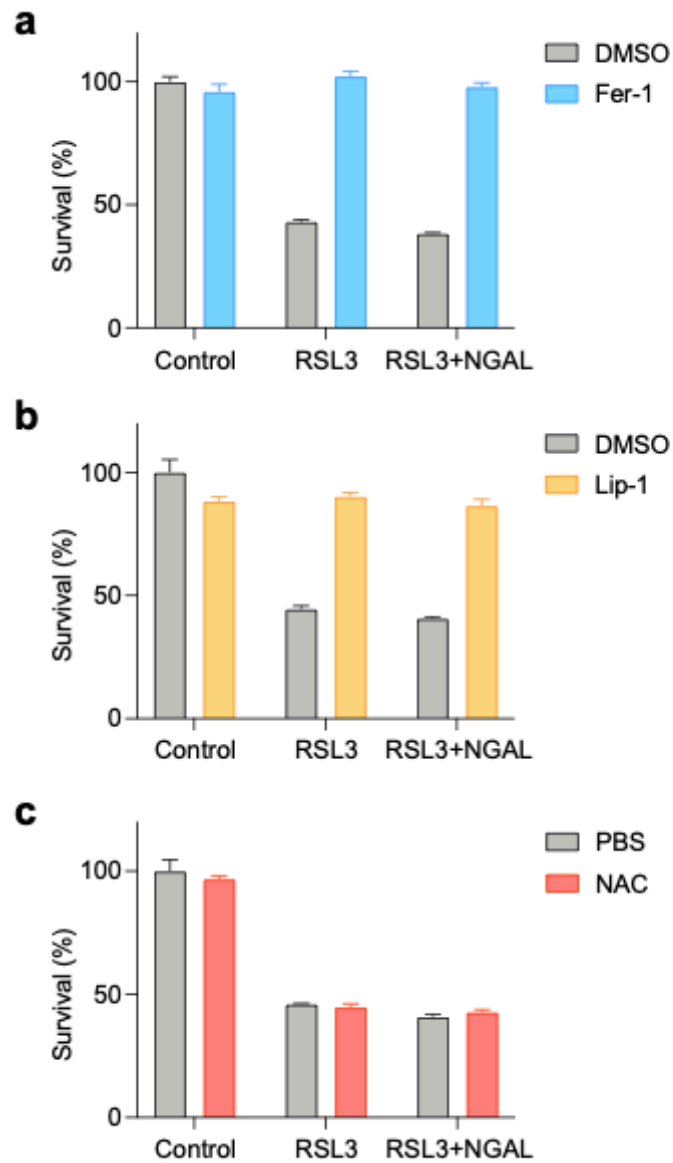

216

217

218

219 **Supplementary Fig. S15 | NGAL protein has no obvious effect on**

220 **ferroptotic cells.** The NGAL protein used on RSL3 induced ferroptosis with

221 Fer-1 (a), Lip-1 (b), or NAC (c).

222

223 **Supplementary Fig. S16**

224

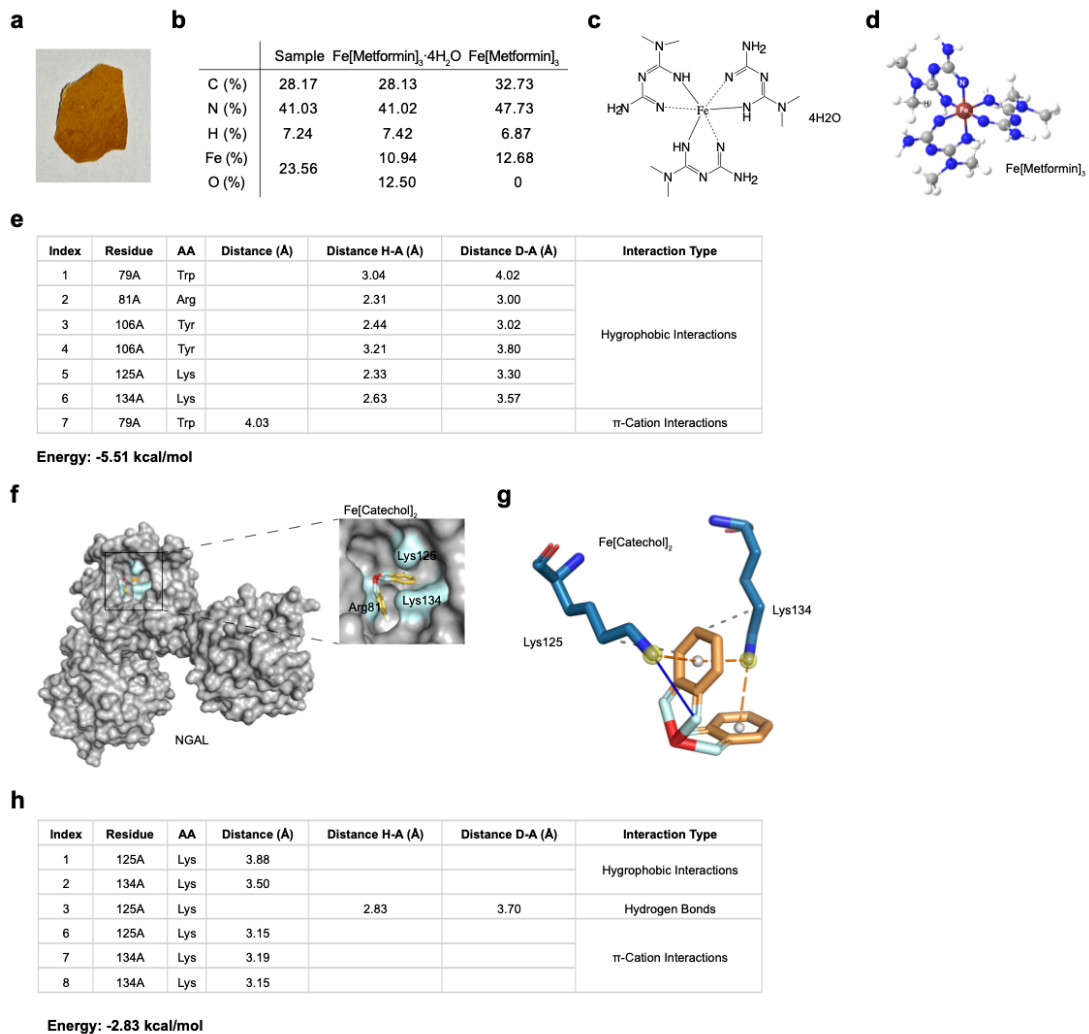

225

226

227 **Supplementary Fig. S16 | Close-up view of the electrostatic surface of the**

228 **three-dimensional diagram and the interactions within the complexes. a.**

229 **The appearance of the Fe[Metformin]<sub>3</sub> · 4H<sub>2</sub>O complex. b. Element analysis of**

230 **the Fe[Metformin]<sub>3</sub> · 4H<sub>2</sub>O complex. c-d. Two-dimensional (c) and three-**

231 **dimensional (d) chemical structures of the complex formed between Fe and**

232 **[Metformin]<sub>3</sub> coordinated with 4H<sub>2</sub>O. e. Types of interaction force between the**

233 **Ngal protein and either Fe[Metformin]<sub>3</sub> · 4H<sub>2</sub>O complex. f. Close-up view of the**

234 **electrostatic surface of the three-dimensional structure consisting of the Ngal**

235 **protein, catechol and Fe. g. Forces between the indicated residues in the Ngal**

236 **protein and the Fe[Catechol]<sub>2</sub> complex are shown. h. Types of interaction force**

237 **between the Ngal protein and either Fe[Catechol]<sub>2</sub>.**

238

239 **Supplementary Fig. S17**

240

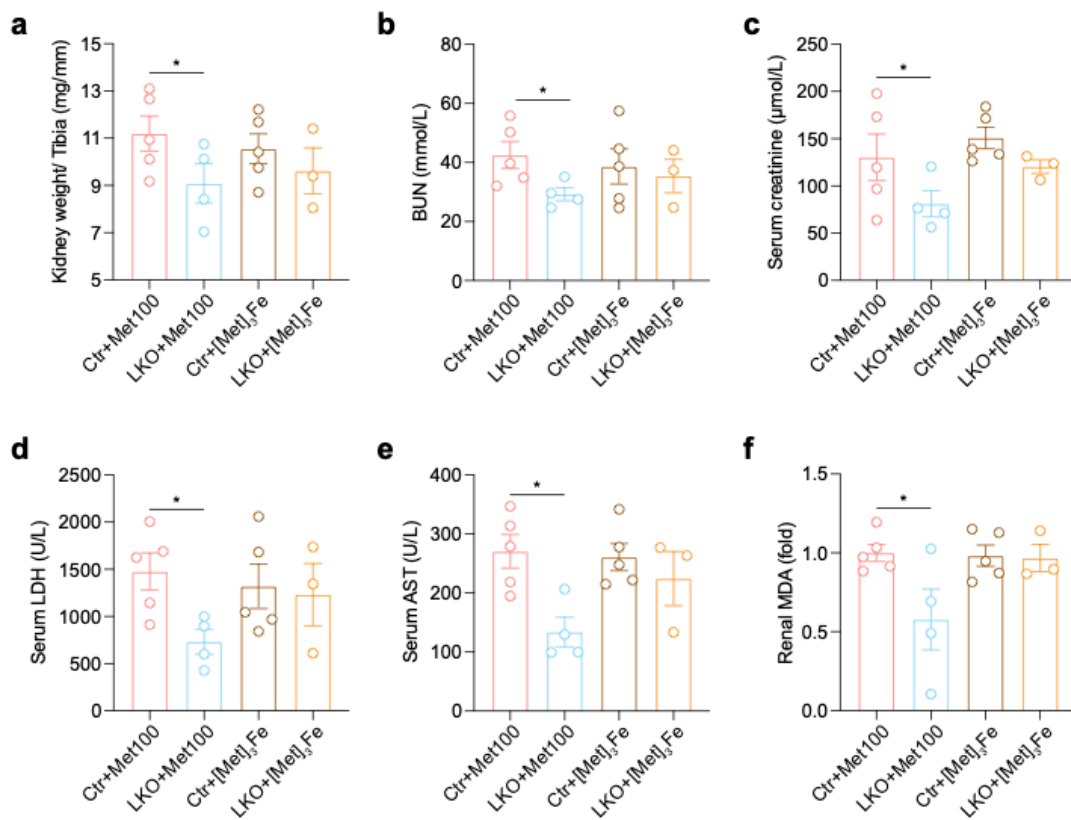

241

242

243 **Supplementary Fig. S17 | [Metformin]<sub>3</sub>Fe complex reverses the phenotype**

244 **of *Tmprss6* liver specific knockout mice (LKO).**

245 **a.** Summary of the ratio

246 **between kidney weight and tibia length measured in the control or LKO mice**

247 **with metformin or [Metformin]<sub>3</sub>Fe complex. b-e.** Summary of the serum BUN

248 **(b), creatinine (c), LDH (d), and AST (e) measured in the indicated mice. F.**

249 **\* $p < 0.05$  (Student's *t*-test). Data are represented as mean  $\pm$  SEM.**

250

251 **Supplementary Fig. S18**

252

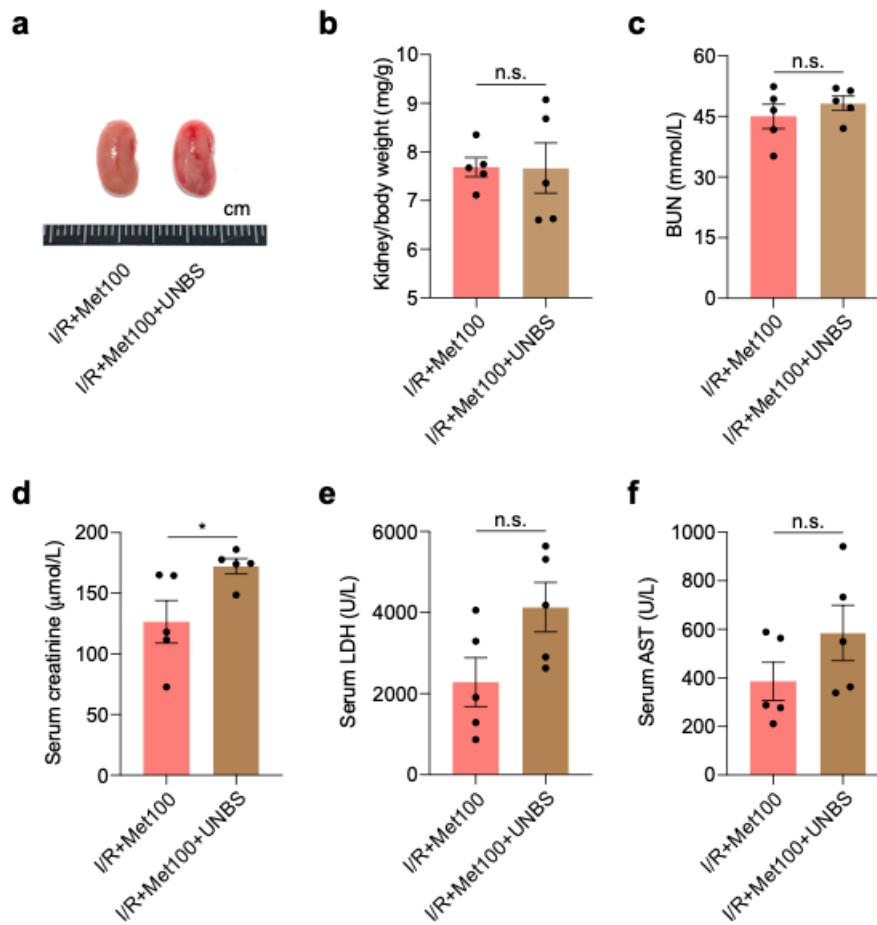

253

254

255 **Supplementary Fig. S18 | Cxcl family inhibitor has no apparent effect on**

256 **metformin nephrotoxicity. a.** Representative image of kidneys removed from

257 a mouse following I/R+Met100 (100 mg/kg), and a mouse in

258 I/R+Met100+UNBS (UNBS5162, 50 mg/kg) group. **b.** Summary of the kidney

259 to body weight ratio measured in the indicated mice. **c-f.** Summary of serum

260 BUN (c), creatinine (d), LDH (e), and AST (f) measured in the indicated mice.

261 \* $p < 0.05$  (Student's *t*-test). Data are represented as mean  $\pm$  SEM.

262

263 **Supplementary Fig. S19**

264

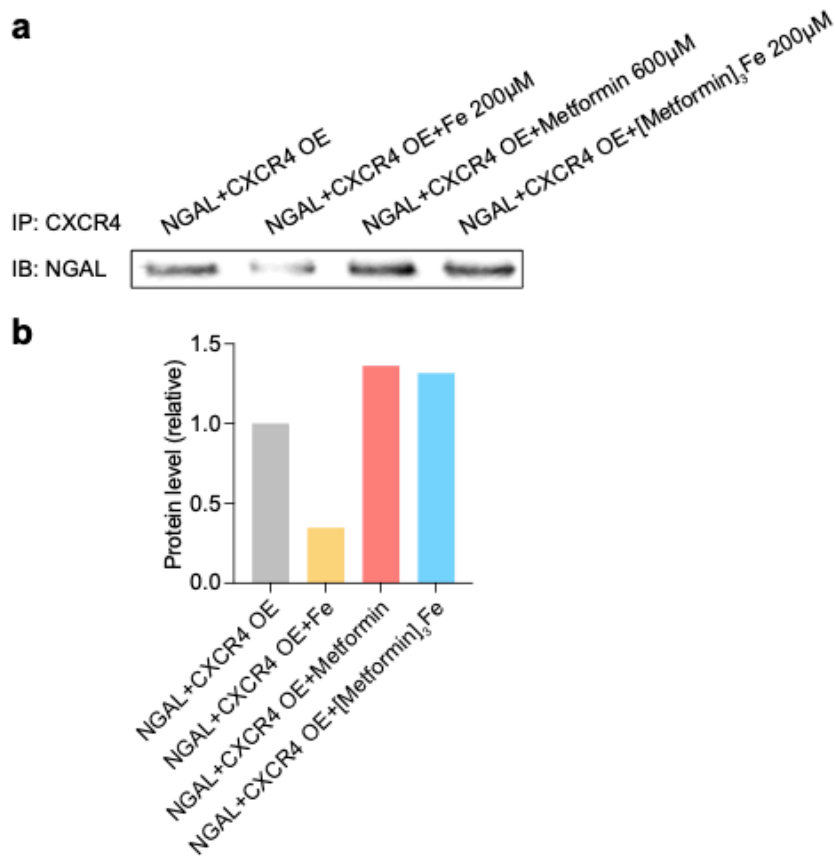

265

266

267

268 **Supplementary Fig. S19 | CXCR4 and NGAL were co-expressed with FeCl<sub>3</sub>**

269 **or metformin or [Metformin]<sub>3</sub>Fe complex in HEK293T cells. a.** Co-IP of

270 NGAL and CXCR4 under indicated conditions. After 48 hours transfection, the

271 cell lysates were immunoprecipitated using protein A/G beads to pull-down

272 CXCR4 (IP), respectively, followed by immunoblotting (IB) with the NGAL

273 antibody. **b.** Relative quantification of immunoblots.

274

## Supplementary Table S1.

### Characteristics of the 49 studies included in the meta-analysis.

| NO. | First author, source year            | Total cases | Age in years, mean $\pm$ SD or median (range) | Standard                           | Metformin-treated, n | Non-metformin-treated, n | Renal impairment (Met), n | Renal impairment (Non-Met), n |
|-----|--------------------------------------|-------------|-----------------------------------------------|------------------------------------|----------------------|--------------------------|---------------------------|-------------------------------|
| 1   | Amin S, Am J of Gastro, 2016         | 1916        | NA                                            | CKD                                | 1098                 | 818                      | 342                       | 387                           |
| 2   | Andersson C, Diabetologia, 2010      | 10920       | NA                                            | NA                                 | 2952                 | 7968                     | 9                         | 16                            |
| 3   | Carlson N, Diabetes Obes Metab, 2016 | 168443      | NA                                            | eGFR < 60ml/min/1.73m <sup>2</sup> | 119153               | 49290                    | 846                       | 169                           |
| 4   | Chang Ch, PDS, 2016                  | 101082      | NA                                            | CKD + RF                           | 50541                | 50541                    | 7644                      | 7655                          |
| 5   | Chen YY, J of Ophthalm, 2019         | 68205       | 56.1 $\pm$ 12.6                               | CKD                                | 45524                | 22681                    | 5444                      | 5399                          |
| 6   | Cheng JJS, Clin Geni Cancer, 2016    | 390         | NA                                            | Chronic renal failure              | 184                  | 206                      | 17                        | 44                            |
| 7   | Cheng X, Cell Meta, 2020             | 1213        | 63.0 (56.0-69.0)                              | CKD                                | 678                  | 535                      | 16                        | 14                            |
| 8   | Degner NR, CID, 2018                 | 634         | 71.0 (57.5-79.2)                              | CKD                                | 216                  | 418                      | 40                        | 52                            |

|    |                                      |        |            |                                    |        |        |       |       |
|----|--------------------------------------|--------|------------|------------------------------------|--------|--------|-------|-------|
| 9  | Doenyas-Barak K, Critical Care, 2016 | 162    | NA         | AKI                                | 44     | 118    | 38    | 65    |
| 10 | Ekstrom N, BMJ Open, 2012            | 51675  | 65.3 ± 9.8 | eGFR < 60ml/min/1.73m <sup>2</sup> | 32848  | 18827  | 4833  | 13741 |
| 11 | Emslie-Smith AM, Diabetic Med, 2001  | 7021   | 63         | serum creatinine ≥ 150 mmol/l      | 1847   | 5174   | 89    | 59    |
| 12 | Eppenga WL, Diabetes Care, 2014      | 258539 | NA         | eGFR < 60ml/min/1.73m <sup>2</sup> | 223968 | 34571  | 30328 | 8391  |
| 13 | Fralick M, Diabetes Obes Metab, 2021 | 528244 | NA         | CKD + AKI +DN                      | 518280 | 9964   | 28690 | 723   |
| 14 | Fung CSC, Cardio Diab, 2015          | 18093  | NA         | CKD stage 3                        | 10893  | 7200   | 876   | 633   |
| 15 | Gómez H, Crit Care Med, 2022         | 14847  | NA         | AKI                                | 682    | 14165  | 339   | 9116  |
| 16 | Hakimi AA, CUAJ, 2013                | 784    | 62         | High pathological grade in RCC     | 55     | 729    | 30    | 349   |
| 17 | Hippisley-Cox J, BMJ, 2016           | 476288 | NA         | CKD                                | 256024 | 220264 | 3067  | 6553  |
| 18 | Hung SC, Lancet Diab Endo, 2005      | 3252   | NA         | Nephrologist visits > 6            | 813    | 2439   | 346   | 1047  |
| 19 | Inzucchi SE, Diabetes Care, 2005     | 8594   | NA         | creatinine ≥ 1.5mg/dl              | 1273   | 7321   | 345   | 3739  |
| 20 | Jo YS, TRD, 2017                     | 128    | NA         | CKD                                | 33     | 95     | 1     | 21    |
| 21 | Jochmans S, Ann Intensive Care, 2017 | 635    | NA         | AKI                                | 395    | 240    | 268   | 124   |
| 22 | Jong CB, Int J of Cardio, 2019       | 1157   | NA         | CKD                                | 676    | 481    | 228   | 178   |



|    |                                            |        |             |                                    |        |        |       |       |
|----|--------------------------------------------|--------|-------------|------------------------------------|--------|--------|-------|-------|
| 23 | Kalkan S, Turk Kardiyol Dern Ars, 2022     | 343    | NA          | AKI                                | 148    | 195    | 43    | 58    |
| 24 | Khunti K, BMJ Open, 2020                   | 11837  | 56.5 ± 11.7 | eGFR < 60ml/min/1.73m <sup>2</sup> | 10055  | 1782   | 103   | 58    |
| 25 | Lazarus B, JAMA Int Med, 2018              | 470114 | 60.4 ± 15.5 | eGFR < 60ml/min/1.73m <sup>2</sup> | 188578 | 281536 | 28138 | 80522 |
| 26 | Lee MC, J of Clin Pharm, 2019              | 48316  | NA          | CKD                                | 24158  | 24158  | 1095  | 1056  |
| 27 | Li L, Diabetic Med, 2016                   | 52     | NA          | eGFR < 60ml/min/1.73m <sup>2</sup> | 48     | 4      | 13    | 1     |
| 28 | Liaw J, Diabetes Care, 2022                | 269585 | NA          | DN                                 | 109728 | 159857 | 13623 | 23218 |
| 29 | Marcum ZA, JGIM, 2017                      | 175296 | NA          | eGFR < 60ml/min/1.73m <sup>2</sup> | 111781 | 63515  | 15573 | 24770 |
| 30 | Masoudi FA, Circulation, 2005              | 16156  | NA          | creatinine ≥ 133 umol/L            | 1861   | 14295  | 23    | 94    |
| 31 | Moorter NV, Endocrino Diabet Metabol, 2022 | 467    | NA          | CKD                                | 77     | 390    | 17    | 52    |
| 32 | Nayan M, Clin Geni Cancer, 2017            | 158    | NA          | eGFR < 90ml/min/1.73m <sup>2</sup> | 82     | 76     | 61    | 63    |
| 33 | Newby D, BMJ Open Diab Res Care, 2022      | 112591 | NA          | eGFR < 60ml/min/1.73m <sup>2</sup> | 96140  | 16451  | 4884  | 4279  |
| 34 | Nichols GA, CMRO, 2010                     | 3116   | NA          | Nephropathy                        | 2598   | 518    | 13    | 4     |
| 35 | Pantalone KM, Acta Diabetol, 2009          | 20450  | NA          | Renal disease                      | 10436  | 10014  | 33    | 179   |

|    |                                          |        |               |                                    |        |       |       |       |
|----|------------------------------------------|--------|---------------|------------------------------------|--------|-------|-------|-------|
| 36 | Prasad N, Kidney Int Rep, 2021           | 1467   | NA            | CKD stage 3 4                      | 377    | 1090  | 340   | 1017  |
| 37 | Psutka SP, Urol Oncology, 2015           | 283    | NA            | eGFR < 60ml/min/1.73m <sup>2</sup> | 83     | 200   | 30    | 120   |
| 38 | Rhee JJ, J of Diab and Its Com, 2019     | 38577  | 72.0 ± 10.6   | eGFR < 60ml/min/1.73m <sup>2</sup> | 18971  | 19606 | 12555 | 16195 |
| 39 | Roussel R, Arch Intern Med, 2010         | 20823  | NA            | eGFR < 60ml/min/1.73m <sup>2</sup> | 7738   | 13085 | 6420  | 10634 |
| 40 | Schramm TK, European Heart Jorunal, 2011 | 122719 | NA            | CKD + AKI                          | 72400  | 50319 | 54    | 342   |
| 41 | Selby JV, Diabetes Care, 1999            | 64257  | NA            | plasma creatinine > 1.5mg/dl       | 9875   | 54382 | 128   | 5221  |
| 42 | Shah DD, J of Cardiac Fail, 2010         | 401    | 56 ± 11       | CKD stage 3 4 5                    | 99     | 302   | 28    | 202   |
| 43 | Stephen J, Am J Nephrol, 2015            | 46914  | NA            | CKD                                | 4609   | 42305 | 560   | 2697  |
| 44 | Tang YX, J of Clin and Trans Endo, 2020  | 111186 | 66.37 ± 12.25 | CKD (New/Ongoing Metformin)        | 99959  | 11227 | 19538 | 1429  |
| 45 | Tseng Ch, EJC, 2016                      | 247252 | NA            | Nephropathy                        | 171753 | 75499 | 30668 | 14163 |
| 46 | Usman A, J Thromb Thrombolysis, 2022     | 148    | NA            | Renal disease                      | 34     | 114   | 2     | 18    |
| 47 | Vest LS, Clin Trans, 2018                | 14144  | NA            | eGFR < 60ml/min/1.73m <sup>2</sup> | 665    | 13479 | 464   | 10826 |

|    |                                   |       |    |                                    |       |      |      |     |
|----|-----------------------------------|-------|----|------------------------------------|-------|------|------|-----|
| 48 | Whitlock RH, Mayo Clin Proc, 2020 | 21996 | NA | eGFR < 60ml/min/1.73m <sup>2</sup> | 19990 | 2006 | 1653 | 611 |
| 49 | Yu Q, BMC Cardio Dis, 2020        | 284   | NA | eGFR < 60ml/min/1.73m <sup>2</sup> | 119   | 165  | 9    | 21  |

## Supplementary Table S2.

The number of each cell type in different treatment groups.

|                     |          | Sham  | I/R   | I/R+Met200 | I/R+Met200+Fer-1 |
|---------------------|----------|-------|-------|------------|------------------|
| Nephron             | Podo     | 10    | 24    | 4          | 11               |
|                     | PT       | 26894 | 20239 | 13918      | 15781            |
|                     | LOH      | 902   | 1322  | 379        | 429              |
|                     | DCT      | 913   | 1781  | 618        | 1666             |
|                     | CD-PC    | 179   | 373   | 71         | 166              |
| Ureteric epithelium | CD-IC    | 164   | 196   | 140        | 327              |
|                     | CD-Trans | 30    | 79    | 2          | 130              |
|                     | Neutro   | 139   | 200   | 1152       | 94               |
| Immune cells        | Macro    | 357   | 396   | 225        | 119              |
|                     | T        | 188   | 177   | 105        | 82               |
|                     | Lymph    | 45    | 42    | 64         | 33               |
|                     | B        | 45    | 42    | 64         | 33               |
|                     | Lymph    | 45    | 42    | 64         | 33               |
| Interstitial cells  | NK       | 208   | 194   | 120        | 100              |
|                     | Endo     | 613   | 3653  | 2502       | 2083             |
|                     | Fib      | 86    | 342   | 178        | 91               |
